# Supplementary material for: Two-photon excited fluorescence of silica nanoparticles loaded with a fluorene-based monomer and its cross-conjugated polymer: their application to cell imaging
Source: Royal Society of Chemistry journal article supplement (doi:10.1039/c2nr31925j), 2012-01-01
Supplement: c2nr31925j.pdf [file c2nr31925j.pdf]

Supplementary Material (ESI) for *Nanoscale*

## Two-photon excited fluorescence of silica nanoparticles loaded with fluorene-based monomer and its cross-conjugated polymer: their application to cell imaging

Laura Aparicio-Ixta<sup>1</sup>, Gabriel Ramos-Ortiz<sup>1\*</sup>, Juan L. Pichardo-Molina<sup>1</sup>, José Luis Maldonado<sup>1</sup>, Mario Rodríguez<sup>1</sup>, Víctor M. Tellez-Lopez<sup>2</sup>, Daniel Martínez-Fong<sup>2,3</sup>, Mikhail G. Zolotukhin<sup>4</sup>, Serguei Fomine<sup>4</sup>, Marco. A. Meneses-Nava<sup>1</sup>, Oracio Barbosa-García<sup>1</sup>

<sup>1</sup>Centro de Investigaciones en Óptica A.C., A.P. 1-948, 37000 León, Gto., Mexico

<sup>2</sup>Departamento de Fisiología, Biofísica y Neurociencias, <sup>3</sup>Programa de Doctorado en Nanociencias y Nanotecnología, CINVESTAV, Apdo. Postal 14-740, 07000 México, D.F., Mexico

<sup>4</sup>Instituto de Investigaciones en Materiales, Universidad Nacional Autónoma de México, Apartado Postal 70-360, CU, Coyoacán 04510, México D. F., Mexico

\*Corresponding author: [garamoso@cio.mx](mailto:garamoso@cio.mx)

### Charge transfer (CT) character of M1 and P1

Figure S1 shows the model used for **M1** in DFT calculations and the most important molecular orbitals involved in the electronic transitions. The long wavelength absorption maxima ( $S_0 \rightarrow S_1$ ) resulted to be  $\lambda_{\text{max}}=397$  nm (415 nm experimentally). This transition shows a significant charge transfer (CT) character, where the charge is transferred from  $\pi$  orbitals of fluorene fragment to  $\pi^*$  orbitals of benzothiadiazole moiety. Broad and intense absorption maxima for **M1** in the range 280-340 nm can be attributed to  $S_0 \rightarrow S_2$  and  $S_0 \rightarrow S_3$  transitions. In the case of  $S_0 \rightarrow S_3$ , the transition has high oscillator strength (1.22) and involves  $\pi$  orbitals extended over entire molecule (HOMO  $\rightarrow$  LUMO+1). On the other hand, the weaker  $S_0 \rightarrow S_2$  transition (HOMO-1  $\rightarrow$  LUMO) has CT character similar to  $S_0 \rightarrow S_1$ .

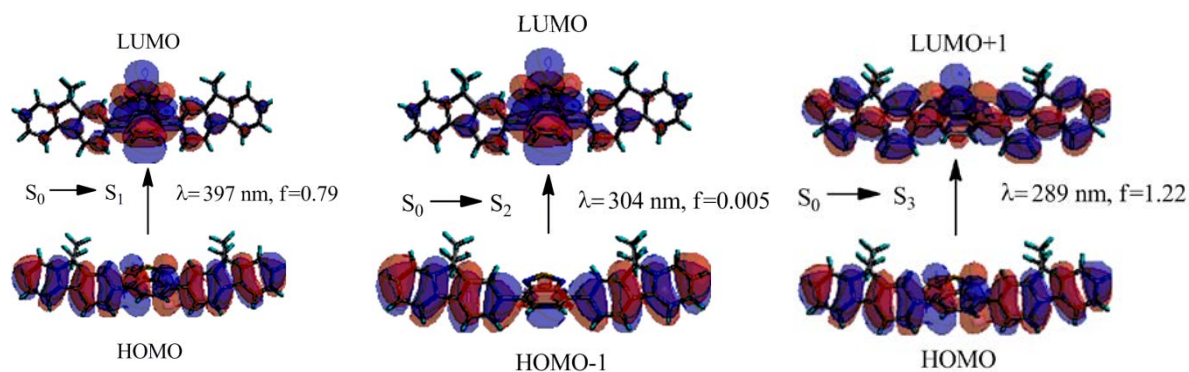

**Figure S1.** The most important excitations contributing to the transitions in **M1**.

Figure S2 shows the model used for **P1** in DFT calculations. In this case **P1** was modelled using an oligomer as depicted in the figure. The long wavelength absorption maxima ( $S_0 \rightarrow S_1$ ) involves mostly four molecular orbitals (HOMO-1, HOMO, LUMO, LUMO+1, LUMO+2 and LUMO+3) as it has a charge transfer (CT) character similar to **M1**. It is noteworthy to note that  $S_0 \rightarrow S_2$  transition also has CT character and lies very close to  $S_0 \rightarrow S_1$  (395 nm), contributing to the long wave absorption of **P1**, but with very weak oscillator strength. For short wavelength absorption, the most intense transition is  $S_0 \rightarrow S_5$  ( $\lambda_{\max}=291$ , oscillator strength 2.40), corresponding to a combination of HOMO-1  $\rightarrow$  LUMO+3 and HOMO  $\rightarrow$  LUMO+2, with no CT character.

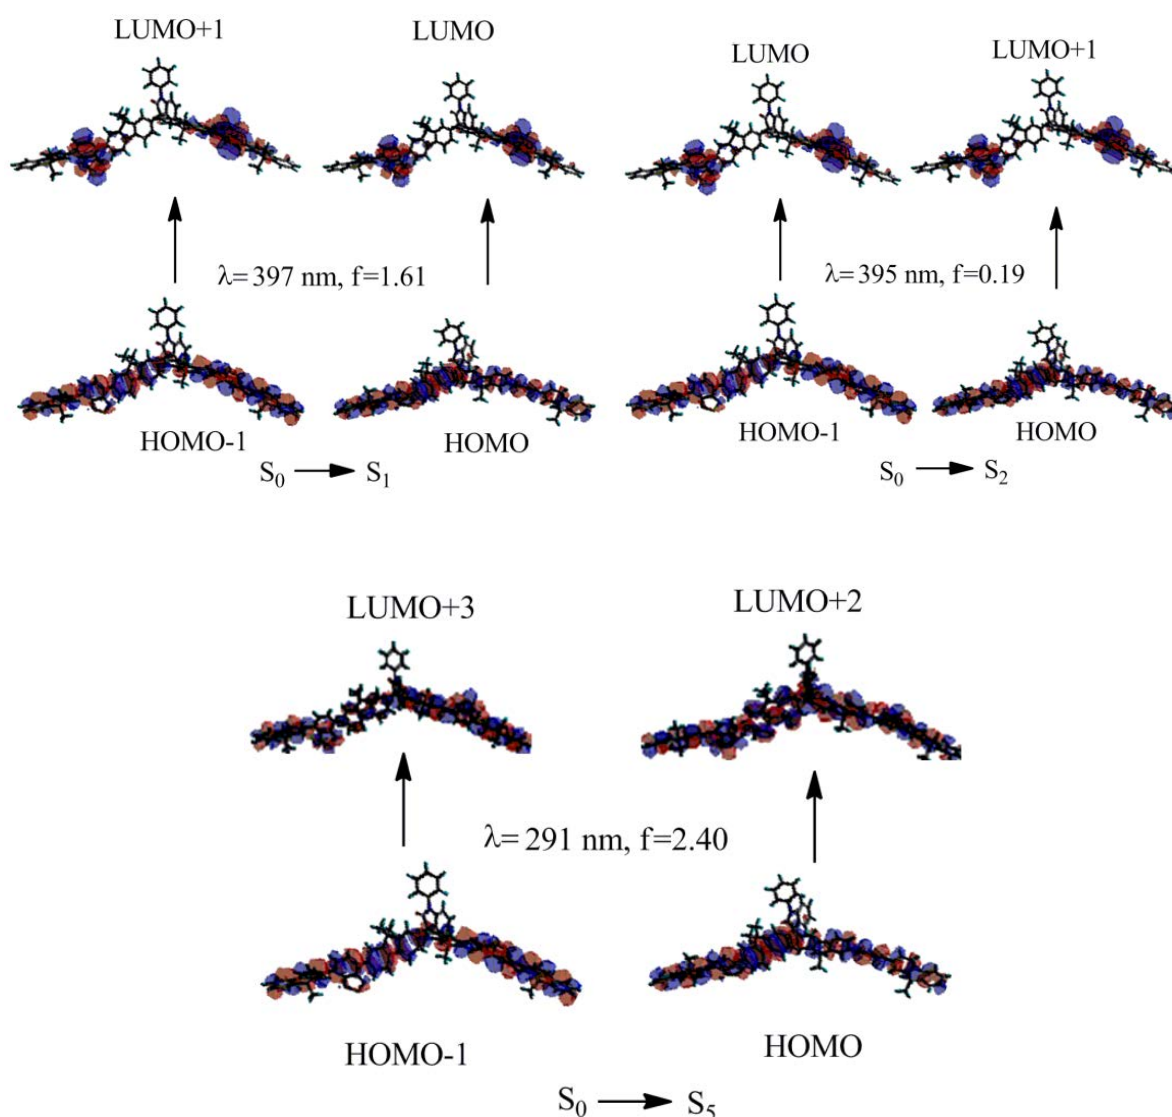

**Figure S2.** The most important excitations contributing to the transitions of an oligomer structure used as a model for **P1**.

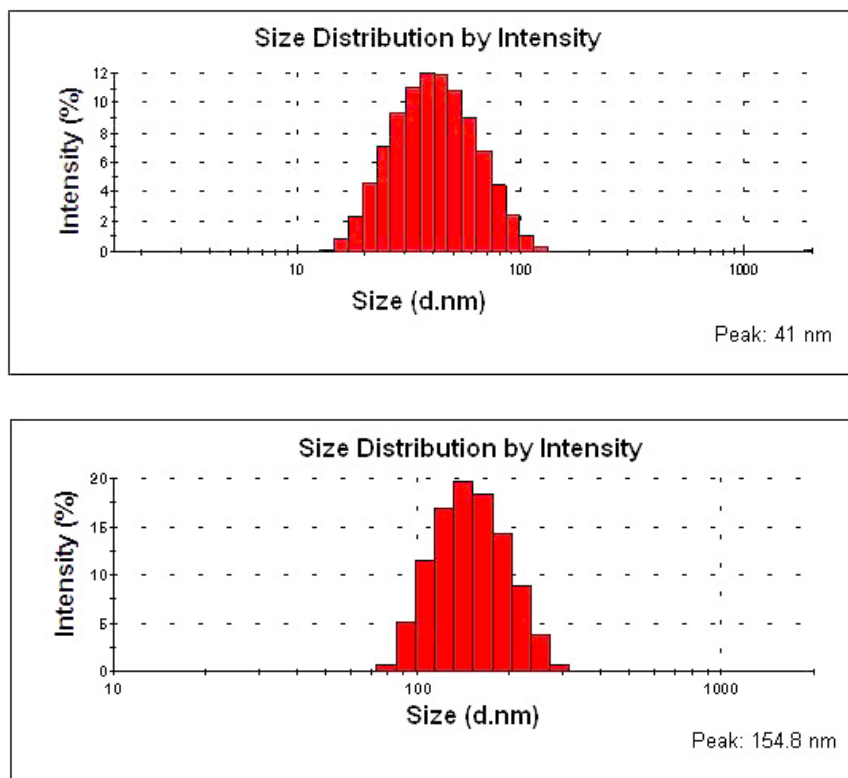

**Figure S3.** Nanoparticles size distribution obtained through DLS for: upper) **P1**-NPs suspension with CTAB concentration of 0.08 mM, bottom) **P1**-SNPs suspension processed with aerosol-OT at concentration of 50 mM.

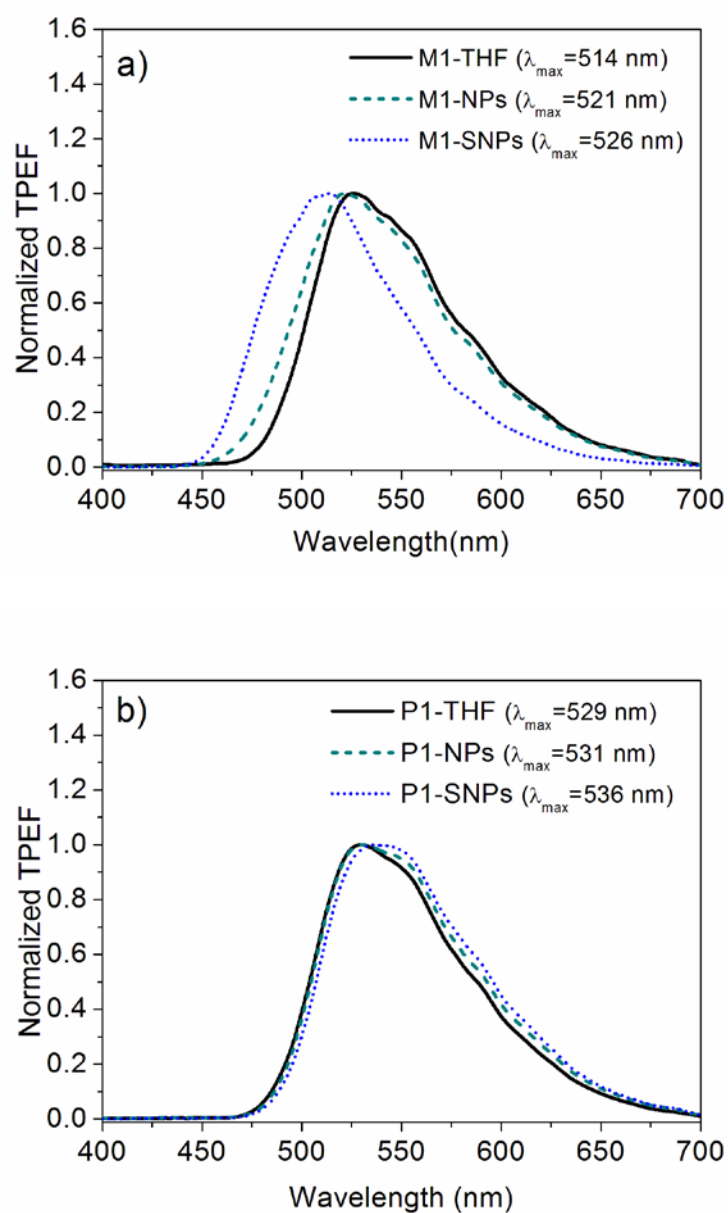

**Figure S4.** Normalized TPEF spectra for a) monomer **M1** and b) polymer **P1** in solutions and aqueous suspensions. Excitation: femtosecond pulses at 750 nm
